# Supplementary material for: Entangling Mobility and Interactions in Social Media
Source: PubMed Central journal article supplement (PMC3961345; doi:10.1371/journal.pone.0092196), 2014-03-20
Supplement: pone.0092196.s009.pdf [file pone.0092196.s009.pdf]

|    | $R_1$ | $P(k)$ | $R(d)$ | $J_f(d)$ | $C(d)$ | $P(D)$ | $N_c$ | $C_{\text{avg}}$ | Err  |
|----|-------|--------|--------|----------|--------|--------|-------|------------------|------|
| US | 0.60  | 0.35   | 0.17   | 0.33     | 0.56   | 0.41   | 0.01  | 0.05             | 0.30 |
| UK | 0.20  | 0.43   | 0.15   | 0.25     | 0.25   | 0.06   | 0.02  | 0.34             | 0.18 |
| DE | 0.56  | 0.60   | 0.53   | 0.36     | 0.21   | 0.36   | 0.56  | 0.17             | 0.39 |
